# Supplementary material for: Synthesis of high surface area porous carbon from anaerobic digestate and it's electrochemical study as an electrode material for ultracapacitors
Source: Royal Society of Chemistry journal article supplement (doi:10.1039/c9ra06603a), 2019-01-01
Supplement: c9ra06603a1.pdf [file c9ra06603a1.pdf]

## Supporting Information

### Synthesis of High Surface Area Porous Carbon from Anaerobic Digestate and its Electrochemical Study as an Electrode Material for Ultracapacitor

Vikash Chaturvedi <sup>a,b</sup> Saurabh Usgaonkar <sup>c</sup>, and Manjusha V. Shelke <sup>a,b,\*</sup>

<sup>a</sup> Physical and Materials Chemistry Division, CSIR-National Chemical Laboratory, Pune-411008, MH, India.

<sup>b</sup> Academy of Scientific and Innovative Research (AcSIR), Ghaziabad-201002, UP, India.

<sup>c</sup> Polymer Science and Engineering Division, CSIR-National Chemical Laboratory, Pune-411008, MH, India

E-mail: [mv.shelke@ncl.res.in](mailto:mv.shelke@ncl.res.in)

**SI Table S1.** Comparison chart for various bio-waste derived carbons on multiple parameters like specific capacitance at the particular current density, specific surface area achieved, the electrolyte used and activation method employed.

| Sr.No. | Carbon source | Specific capacitance (F/g) | Current density/ Scan rate | Specific surface area (m <sup>2</sup> /g) | Electrolyte | Activation method | References |
|--------|---------------|----------------------------|----------------------------|-------------------------------------------|-------------|-------------------|------------|
| 1      | Coffee shell  | 150                        | 1 mV/s                     | 842                                       | KOH         | ZnCl <sub>2</sub> | [1]        |

|   |                                    |     |                          |               |                                 |                   |     |
|---|------------------------------------|-----|--------------------------|---------------|---------------------------------|-------------------|-----|
| 2 | Rice Husk                          | 210 | 0.2<br>mA/g              | 1886          | KCl                             | NaOH              | [2] |
| 3 | Banana<br>fibers                   | 74  | 20 mA/g                  | 686           | Na <sub>2</sub> SO <sub>4</sub> | ZnCl <sub>2</sub> | [3] |
| 4 | Corn<br>grains                     | 257 | 1<br>mA/cm <sup>2</sup>  | 2936-<br>3420 | KOH                             | KOH               | [4] |
| 5 | Coconut<br>shell<br>(melamin<br>e) | 368 | Vs<br><br>Freequen<br>cy | 3000          | KOH                             | KOH               | [5] |
| 6 | Dead<br>neem<br>leaves             | 400 | 0.5 A/g                  | 1230          | H <sub>2</sub> SO <sub>4</sub>  | None              | [6] |
| 7 | Dead<br>ashoka<br>leaves           | 250 | 0.5 A/g                  | 705           | H <sub>2</sub> SO <sub>4</sub>  | None              | [6] |
| 8 | Sugarcane<br>bagasse               | 280 | 1 A/g                    | 1260          | KOH                             | KOH               | [7] |

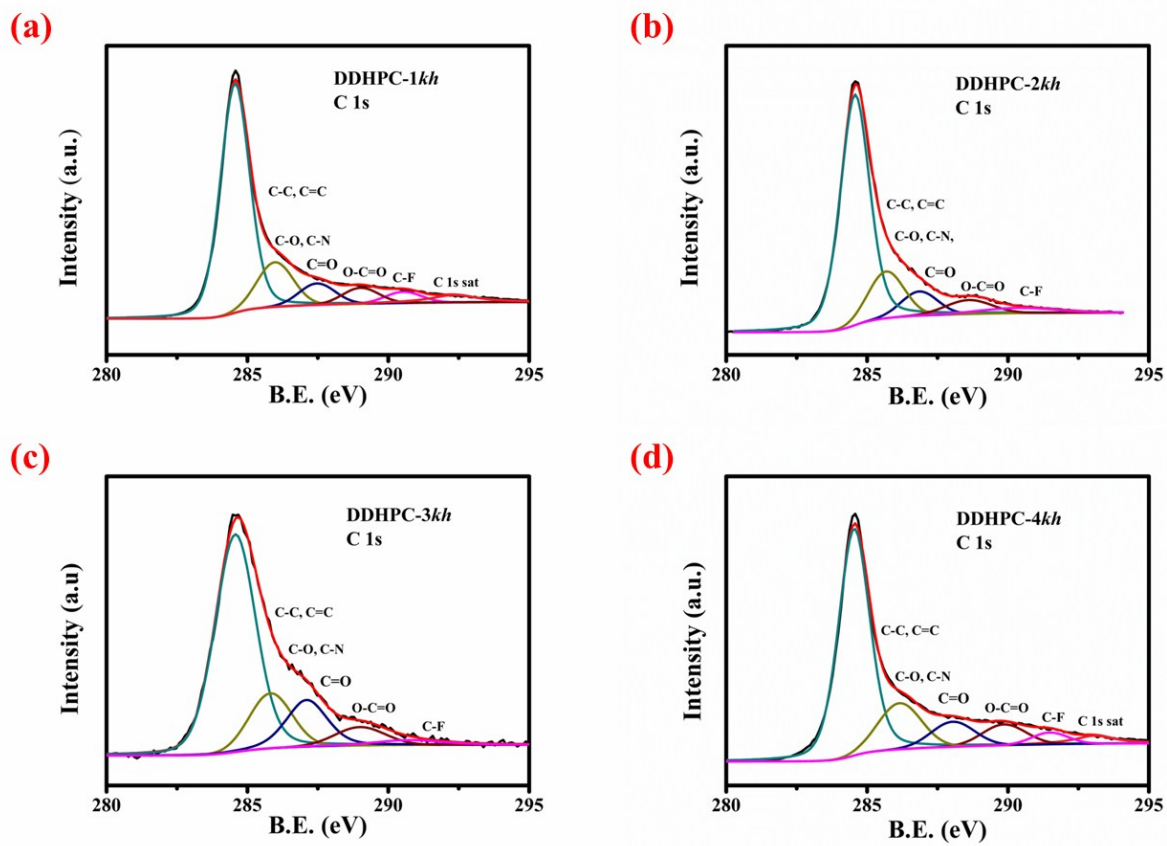

SI Fig S1. Deconvoluted XPS spectra of Carbon C1s for all DDHPC-*kh* samples.

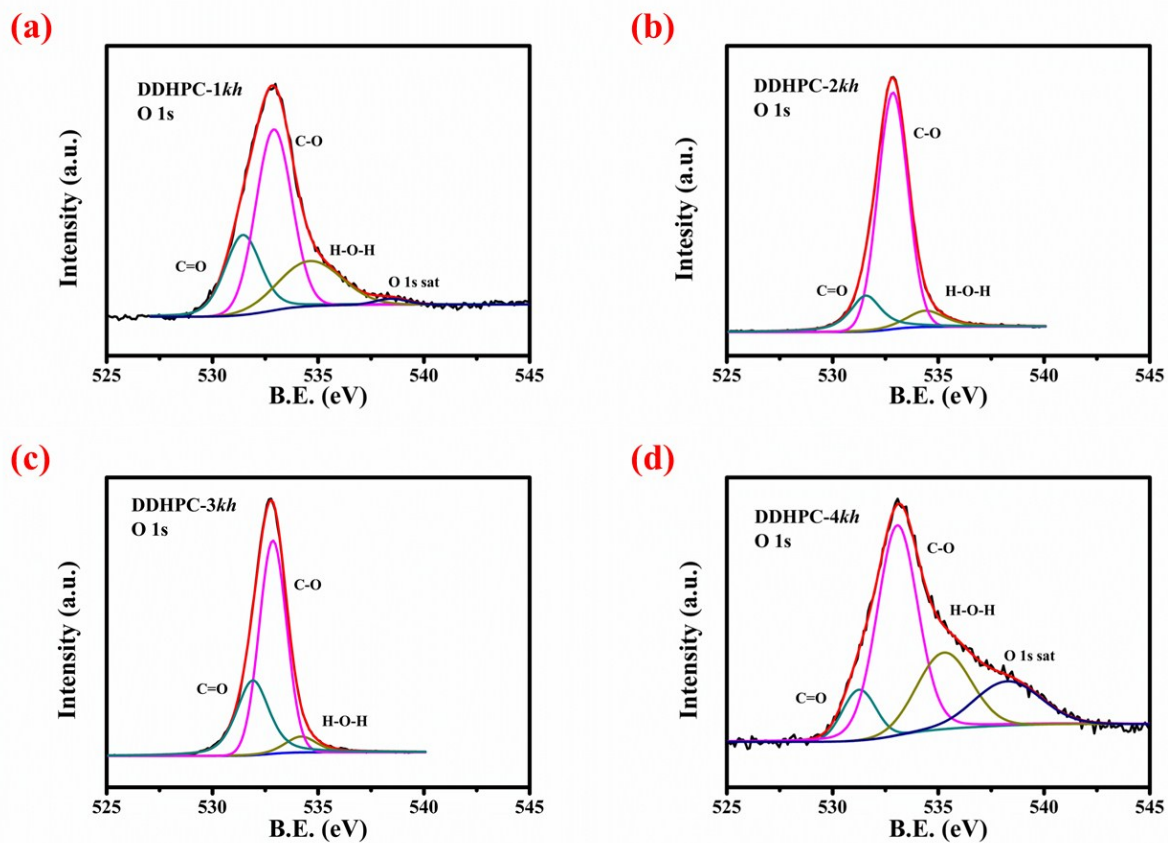

SI Fig S2. Deconvoluted XPS spectra of Oxygen O 1s for all DDHPC-*kh* samples.

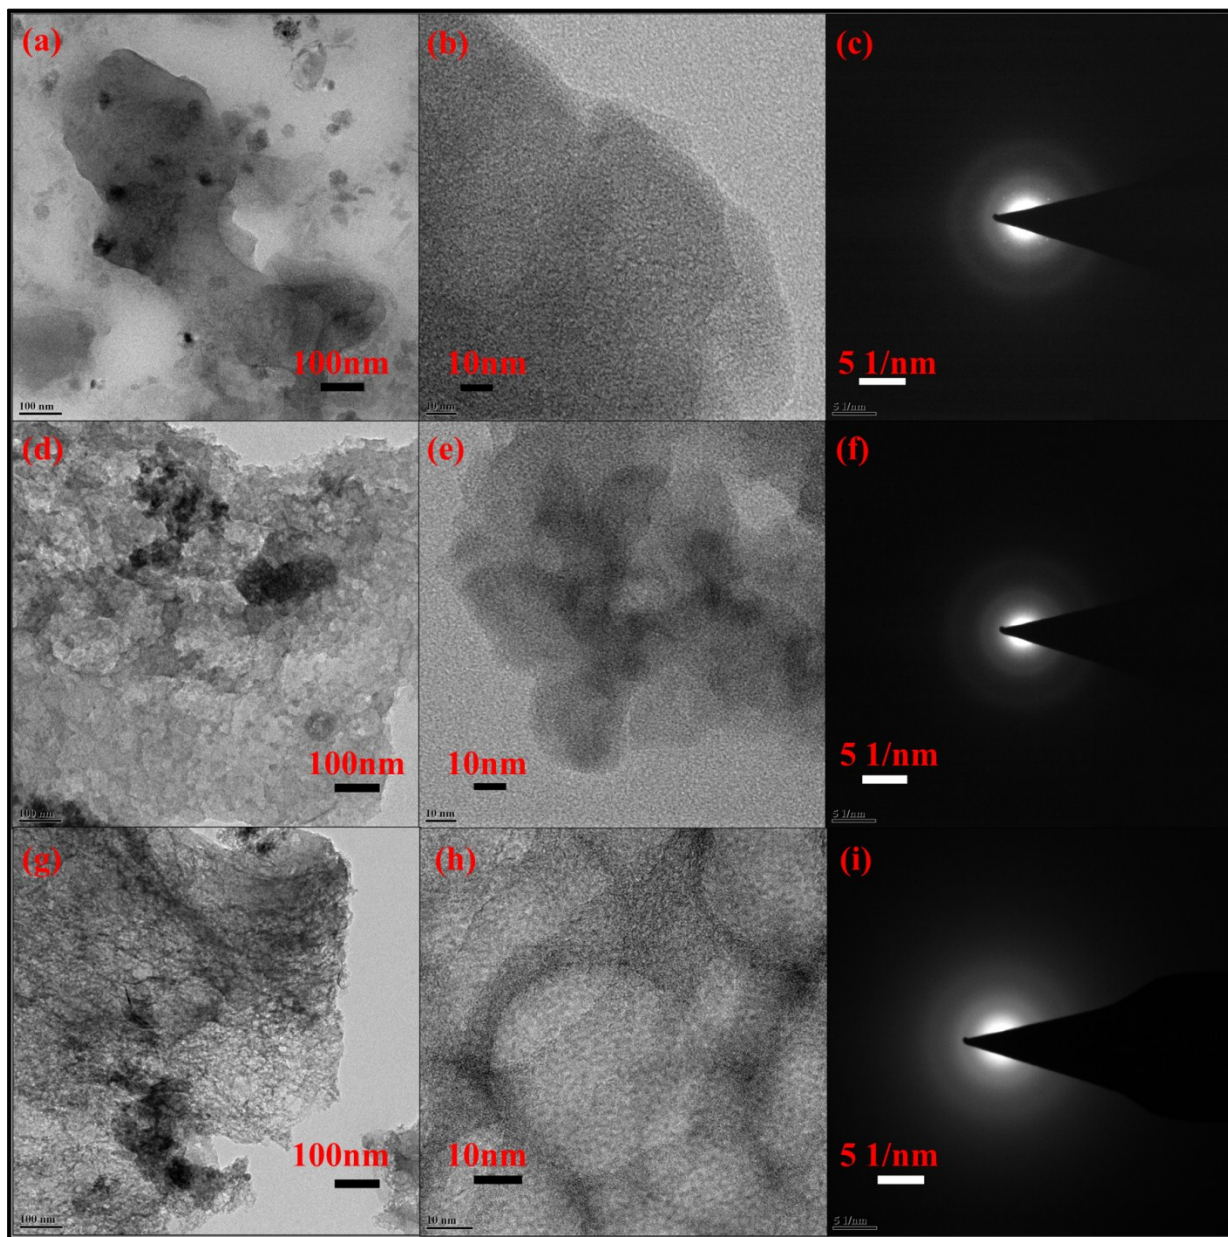

SI Fig S3. TEM Images for DDHPC-4 (a, b, c), DDHPC-4k (d, e, f), and DDHPC-4kh (g, h, i)

## References

- [1] M.R. Jisha, Y.J. Hwang, J.S. Shin, K.S. Nahm, T. Prem Kumar, K. Karthikeyan, N. Dhanikaivelu, D. Kalpana, N.G. Renganathan, A.M. Stephan, Electrochemical characterization of supercapacitors based on carbons derived from coffee shells, *Mater. Chem. Phys.* 115 (2009) 33–39. <https://doi.org/10.1016/j.matchemphys.2008.11.010>.
- [2] Y. Guo, J. Qi, Y. Jiang, S. Yang, Z. Wang, H. Xu, Performance of electrical double layer capacitors with porous carbons derived from rice husk, *Mater. Chem. Phys.* 80 (2003) 704–709. [https://doi.org/10.1016/S0254-0584\(03\)00105-6](https://doi.org/10.1016/S0254-0584(03)00105-6).
- [3] V. Subramanian, C. Luo, A.M. Stephan, K.S. Nahm, S. Thomas, B. Wei, Supercapacitors from activated carbon derived from areca fiber, *J. Phys. Chem. C.* 111 (2007) 7527–7531.
- [4] M.S. Balathanigaimani, W.-G. Shim, M.-J. Lee, C. Kim, J.-W. Lee, H. Moon, Highly porous electrodes from novel corn grains-based activated carbons for electrical double layer capacitors, *Electrochem. Commun.* 10 (2008) 868–871. <https://doi.org/https://doi.org/10.1016/j.elecom.2008.04.003>.
- [5] K. Jurewicz, K. Babel, Efficient Capacitor Materials from Active Carbons Based on Coconut Shell/Melamine Precursors, *Energy & Fuels.* 24 (2010) 3429–3435. <https://doi.org/10.1021/ef901554j>.
- [6] M. Biswal, A. Banerjee, M. Deo, S. Ogale, From dead leaves to high energy density supercapacitors, *Energy Environ. Sci.* 6 (2013) 1249. <https://doi.org/10.1039/c3ee22325f>.
- [7] M. Wahid, D. Puthusseri, D. Phase, S. Ogale, Enhanced capacitance retention in a supercapacitor made of carbon from sugarcane bagasse by hydrothermal pretreatment, *Energy and Fuels.* 28 (2014) 4233–4240. doi: <https://doi.org/10.1021/ef500342d>.
